# Supplementary figures and images for: Intraoperative aerosol box use: does an educational visual aid reduce contamination?
Source: PubMed Central journal article supplement — Korean J Anesthesiol. 2020 Nov 17;74(2):158–64. doi: 10.4097/kja.20511 (PMC8024202; doi:10.4097/kja.20511), 2020-11-17

Supplementary Fig. 1. Total contamination score for control and experimental groups.

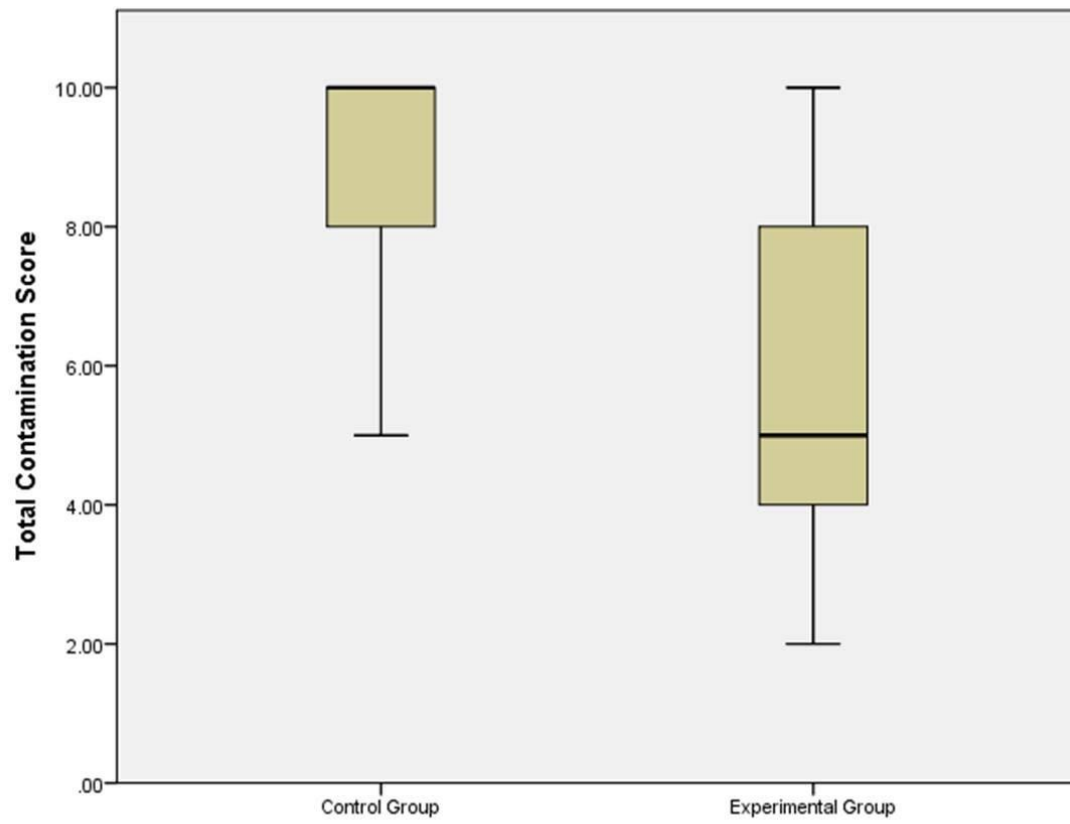

Supplement: kja-20511-suppl2.pdf [file kja-20511-suppl2.pdf]
